# Supplementary material for: Effect of GSTA1 Variants on Busulfan-Based Conditioning Regimen Prior to Allogenic Hematopoietic Stem-Cell Transplantation in Pediatric Asians
Source: MDPI journal article supplement (doi:10.3390/pharmaceutics14020401), 2022-02-11
Supplement: s1 [file s1]

# Effect of *GSTA1* Variants on Busulfan-Based Conditioning Regimen Prior to Allogeneic Hematopoietic Stem-Cell Transplantation in Pediatric Asians

Ai-Hoc Nguyen <sup>1,2</sup>, Mohitosh Biswas <sup>1,2,3</sup>, Apichaya Puangpetch <sup>1,2</sup>, Santirhat Prommas <sup>1,2</sup>, Samart Pakakasama <sup>4</sup>, Usanarat Anurathapan <sup>4</sup>, Jiratha Rachanakul <sup>1,2</sup>, Rattanaporn Sukprasong <sup>1,2</sup>, Nutthan Nuntharadthanaphong <sup>1,2</sup>, Nutcha Jongjitsook <sup>1,2</sup>, Suradej Hongeng <sup>4</sup> and Chonlaphat Sukasem <sup>1,2,5,6,\*</sup>

<sup>1</sup> Division of Pharmacogenomics and Personalized Medicine, Department of Pathology, Faculty of Medicine Ramathibodi Hospital, Mahidol University, Bangkok 10400, Thailand; aihoc050994@gmail.com (A.-H.N.); biswas\_07pharm@ru.ac.bd (M.B.); apichaya.pua@mahidol.ac.th (A.P.); Santirhat.pro@mahidol.ac.th (S.P.); jiratha.rac@mahidol.edu (J.R.); rattanaporn.suk@mahidol.ac.th (R.S.); nutthan.nun@mahidol.ac.th (N.N.); Pear-Nutcha\_1997@hotmail.com (N.J.)

<sup>2</sup> Laboratory for Pharmacogenomics, Somdech Phra Debaratana Medical Center (SDMC), Ramathibodi Hospital, Bangkok 10400, Thailand

<sup>3</sup> Department of Pharmacy, Faculty of Science, University of Rajshahi, Rajshahi 6205, Bangladesh

<sup>4</sup> Division of Hematology-Oncology, Department of Pediatrics, Faculty of Medicine Ramathibodi Hospital, Mahidol University, Bangkok 10400, Thailand; samart.pak@mahidol.ac.th (S.P.); usanarat.anu@mahidol.ac.th (U.A.); suradej.hon@mahidol.ac.th (S.H.)

<sup>5</sup> Division of Pharmacogenomics and Precision Medicine, The Preventive Genomics & Family Check-Up Services Center, Bumrungrad International Hospital, Bangkok 10400, Thailand

<sup>6</sup> MRC Centre for Drug Safety Science, Department of Pharmacology and Therapeutics, Institute of Systems, Molecular and Integrative Biology, University of Liverpool, Liverpool L69 3GL, UK

\* Correspondence: chonlaphat.suk@mahidol.ac.th

**Table S1.** Review of 18 articles about polymorphism of GST family and PK of busulfan.

|             |           | Authors          | Sample Size     | Ethnicity             | Associated PK Parameters               | Associated Genetic Markers                         | References     |
|-------------|-----------|------------------|-----------------|-----------------------|----------------------------------------|----------------------------------------------------|----------------|
| Pediatrics  | Asian     | Nishikawa et al. | 20              | Japanese              | Not detected                           | Not detected                                       | [22]           |
|             |           | Elhasid et al.   | 18              | Israeli               | AUC; Cmax; Cl                          | <i>GSTA1</i> ;<br><i>GSTM1</i> ;<br><i>GSTP1</i> . | [23]           |
|             | Caucasian | Ansari et al.    | 138             | Caucasian;<br>African | AUC; Cl;                               | <i>GSTA1</i> ;<br><i>GSTM1</i> ;                   | [19]           |
|             |           | Nava et al.      | 112             | Caucasian;<br>African | Cl; Vd.                                | <i>GSTA1</i> ;                                     | [39]           |
|             |           | Ansari et al.    | 44              | Middle-east           | AUC; C <sub>ss</sub> ; Cmax;<br>Cl     | <i>GSTA1</i> ;                                     | [24]           |
|             |           | Ten Brink et al. | 84              | Caucasian             | Cl;                                    | <i>GSTA1</i> ;<br><i>CYP39A1</i> ;                 | [15]           |
|             |           | Nava et al.      | 101             | Caucasian             | C <sub>ss</sub> ; Cl; AUC              | <i>GSTA1</i> ;                                     | [52]           |
|             | Adults    | Asian            | Terakura et al. | 55                    | Japanese                               | AUC                                                | <i>GSTA1</i> ; |
| Yin et al.  |           |                  | 25              | Chinese               | AUC; Cl; Cmax;<br>Vd; T <sub>1/2</sub> | <i>GSTA1</i> ;<br><i>GSTP1</i>                     | [21]           |
| Choi et al. |           |                  | 36              | Korean                | AUC; Cl; Vd                            | <i>GSTA1</i>                                       | [37]           |

|           |                  |     |           |                               |                                                 |      |
|-----------|------------------|-----|-----------|-------------------------------|-------------------------------------------------|------|
| Caucasian | Kusama et al.    | 12  | Japanese  | Ke; Cl/F; C <sub>mean</sub> ; | <i>GSTA1</i>                                    | [53] |
|           | Sun et al.       | 43  | Chinese   | Not detected                  | Not detected                                    | [10] |
|           | Kim et al.       | 58  | Korean    | Cl                            | <i>GSTA1</i> ;<br>Combination of<br>GSTM1/GSTT1 | [30] |
|           | Michaud et al.   | 87  | Canadians | AUC; Cl/F                     | <i>GSTA1</i>                                    | [40] |
|           | Marloes et al.   | 62  | Dutch     | Cl                            | <i>GSTA1</i> ;                                  | [54] |
|           | Ten Brink et al. | 66  | Dutch     | Cl, AUC                       | <i>GSTA1</i>                                    | [55] |
|           | Bremer et al.    | 114 | Norwegian | Css                           | <i>GSTA1</i>                                    | [33] |
|           | Abbasi et al.    | 151 | Caucasian | Cl                            | <i>GSTA1</i>                                    | [34] |

Vd: Volume of distribution; Cl: Clearance; AUC: Area Under the Curve; PK: Pharmacokinetic; Ke: Elimination constant; Cl/F: Clearance corrected by bioavailability; C<sub>mean</sub>: Mean of concentration.

**Table S2.** Multivariate regression analysis between PK of Bu and three independent variables: BSA, *GSTA1* and gender.

| Group         | Step | Dependent Variables | Constant                  | BSA                          | Non-Carrier of <i>GSTA1</i> •B | Gender of Male | F Statistic | ΔF        |
|---------------|------|---------------------|---------------------------|------------------------------|--------------------------------|----------------|-------------|-----------|
| All patients  | 1    | T <sub>1/2</sub>    | 118.68                    | 24.27*                       | -                              | -              | 5.02**      | -         |
|               | 2    | T <sub>1/2</sub>    | 137.259                   | 24.82*                       | -26.215**                      | -              | 7.739***    | 9.958***  |
|               | 1    | Cl                  | -3.358 × 10 <sup>-5</sup> | 1.585 × 10 <sup>-4</sup> *** | -                              | -              | 146.5***    | -         |
|               | 2    | Cl                  | -5.720 × 10 <sup>-5</sup> | 1.578 × 10 <sup>-4</sup> *** | 3.333 × 10 <sup>-5</sup> ***   | -              | 87.11***    | 11.149*** |
|               | 1    | Vd                  | -0.009                    | 0.034***                     | -                              | -              | 425.9***    | -         |
|               | 2    | Vd                  | -0.01                     | 0.033***                     | -                              | 0.03**         | 223.7***    | 4.564**   |
|               | 3    | Vd                  | -0.012                    | 0.033***                     | 0.003***                       | 0.003**        | 156.5***    | 4.504**   |
| ≤ 6 years old | 1    | Cl                  | -1.782 × 10 <sup>-5</sup> | 1.448 × 10 <sup>-4</sup> **  | -                              | -              | 50.8***     | -         |
|               | 2    | Cl                  | -4.029 × 10 <sup>-5</sup> | 1.525 × 10 <sup>-4</sup> *** | 2.605 × 10 <sup>-5</sup> ***   | -              | 36.94***    | 9.695***  |
|               | 1    | Vd                  | -0.009                    | 0.037***                     | -                              | -              | 148.6***    | -         |
|               | 2    | Vd                  | -0.012                    | 0.038***                     | 0.003**                        | -              | 86.96***    | 5.417**   |
|               | 3    | Vd                  | -0.012                    | 0.037***                     | 0.003**                        | 0.003**        | 66.14***    | 4.651**   |
| > 6 years old | 1    | T <sub>1/2</sub>    | 169.963                   | -                            | -33.181***                     | -              | 9.625***    | -         |
|               | 2    | T <sub>1/2</sub>    | 158.874                   | -                            | -30.035***                     | 15.525*        | 6.372***    | 2.803*    |
|               | 1    | Cl                  | 1.128 × 10 <sup>-4</sup>  | -                            | 3.903 × 10 <sup>-5</sup> *     | -              | 3.033*      | -         |

\*: *p* value < 0.1; \*\*: *p* value < 0.05; \*\*\*: *p* value < 0.01.
